# Supplementary material for: Dual Functional Mesoporous Silicon Nanoparticles Enhance the Radiosensitivity of VPA in Glioblastoma
Source: PubMed Central journal article supplement — Transl Oncol. 2017 Feb 10;10(2):229–40. doi: 10.1016/j.tranon.2016.12.011 (PMC5304234; doi:10.1016/j.tranon.2016.12.011), 2017-02-10
Supplement: mmc1.pdf [file mmc1.pdf]

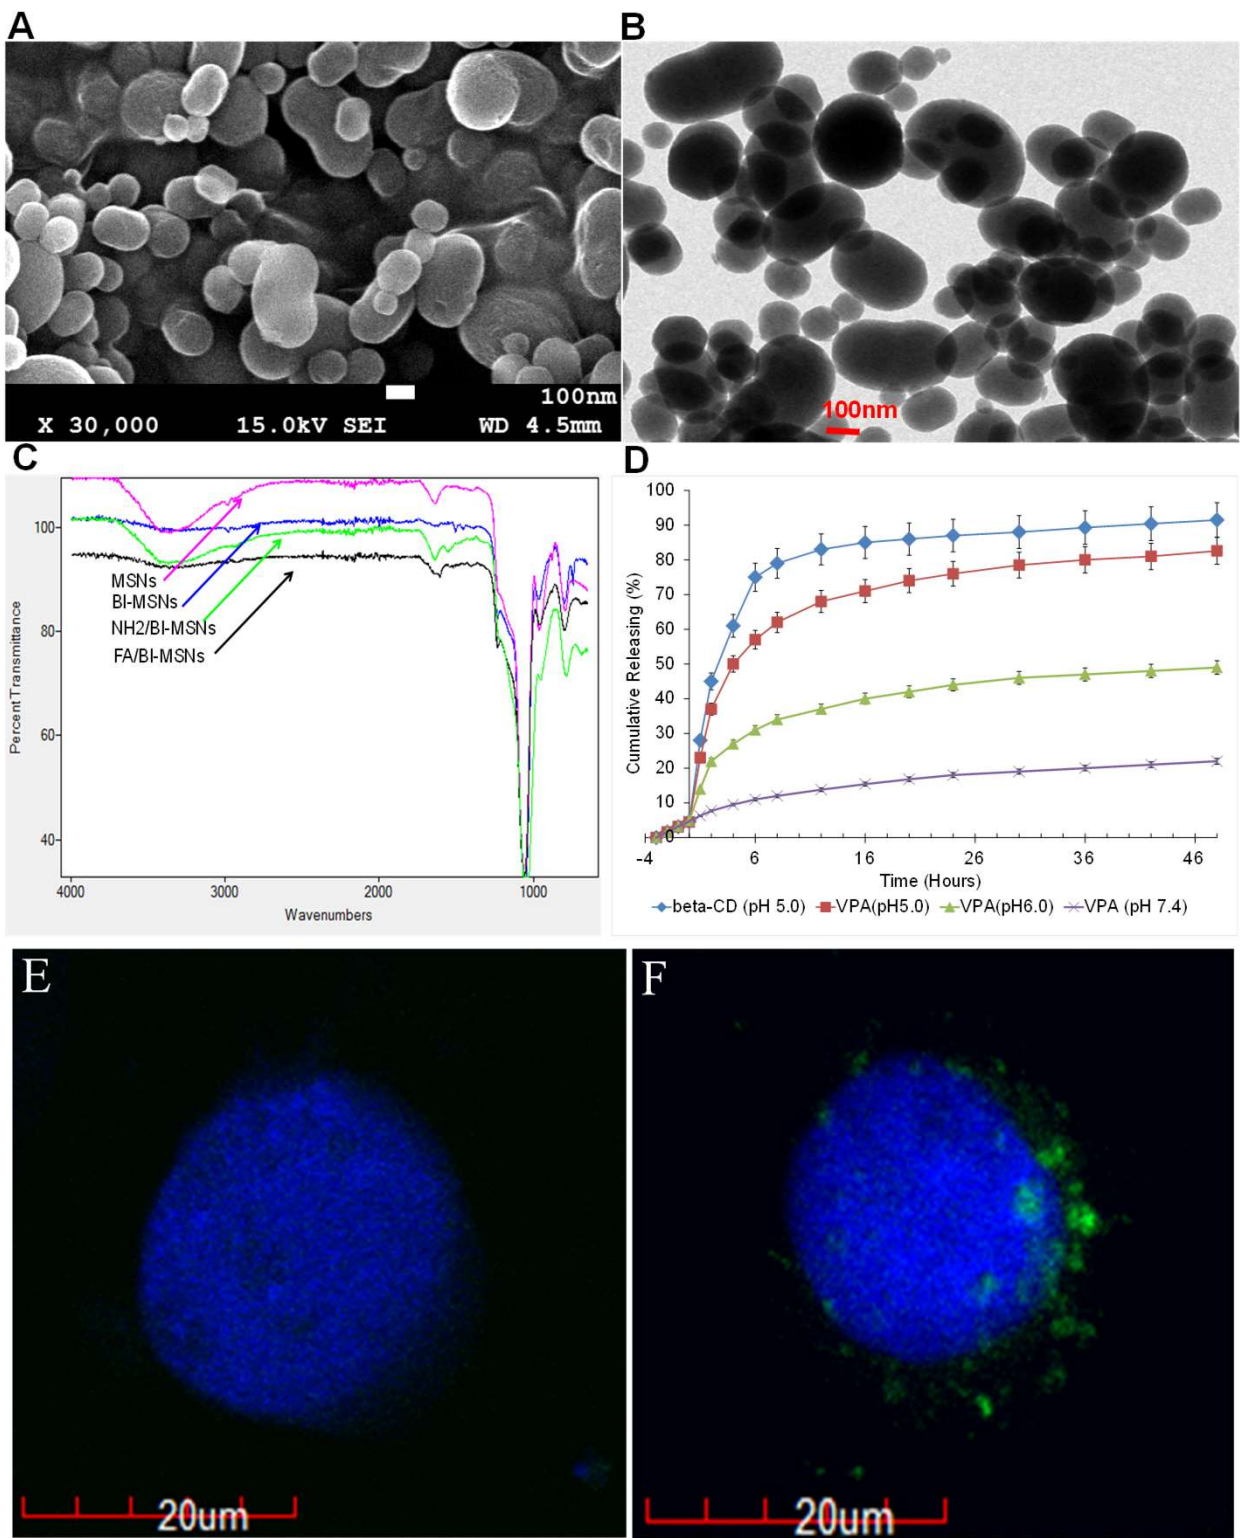

Figure 1

HEK 293

C6

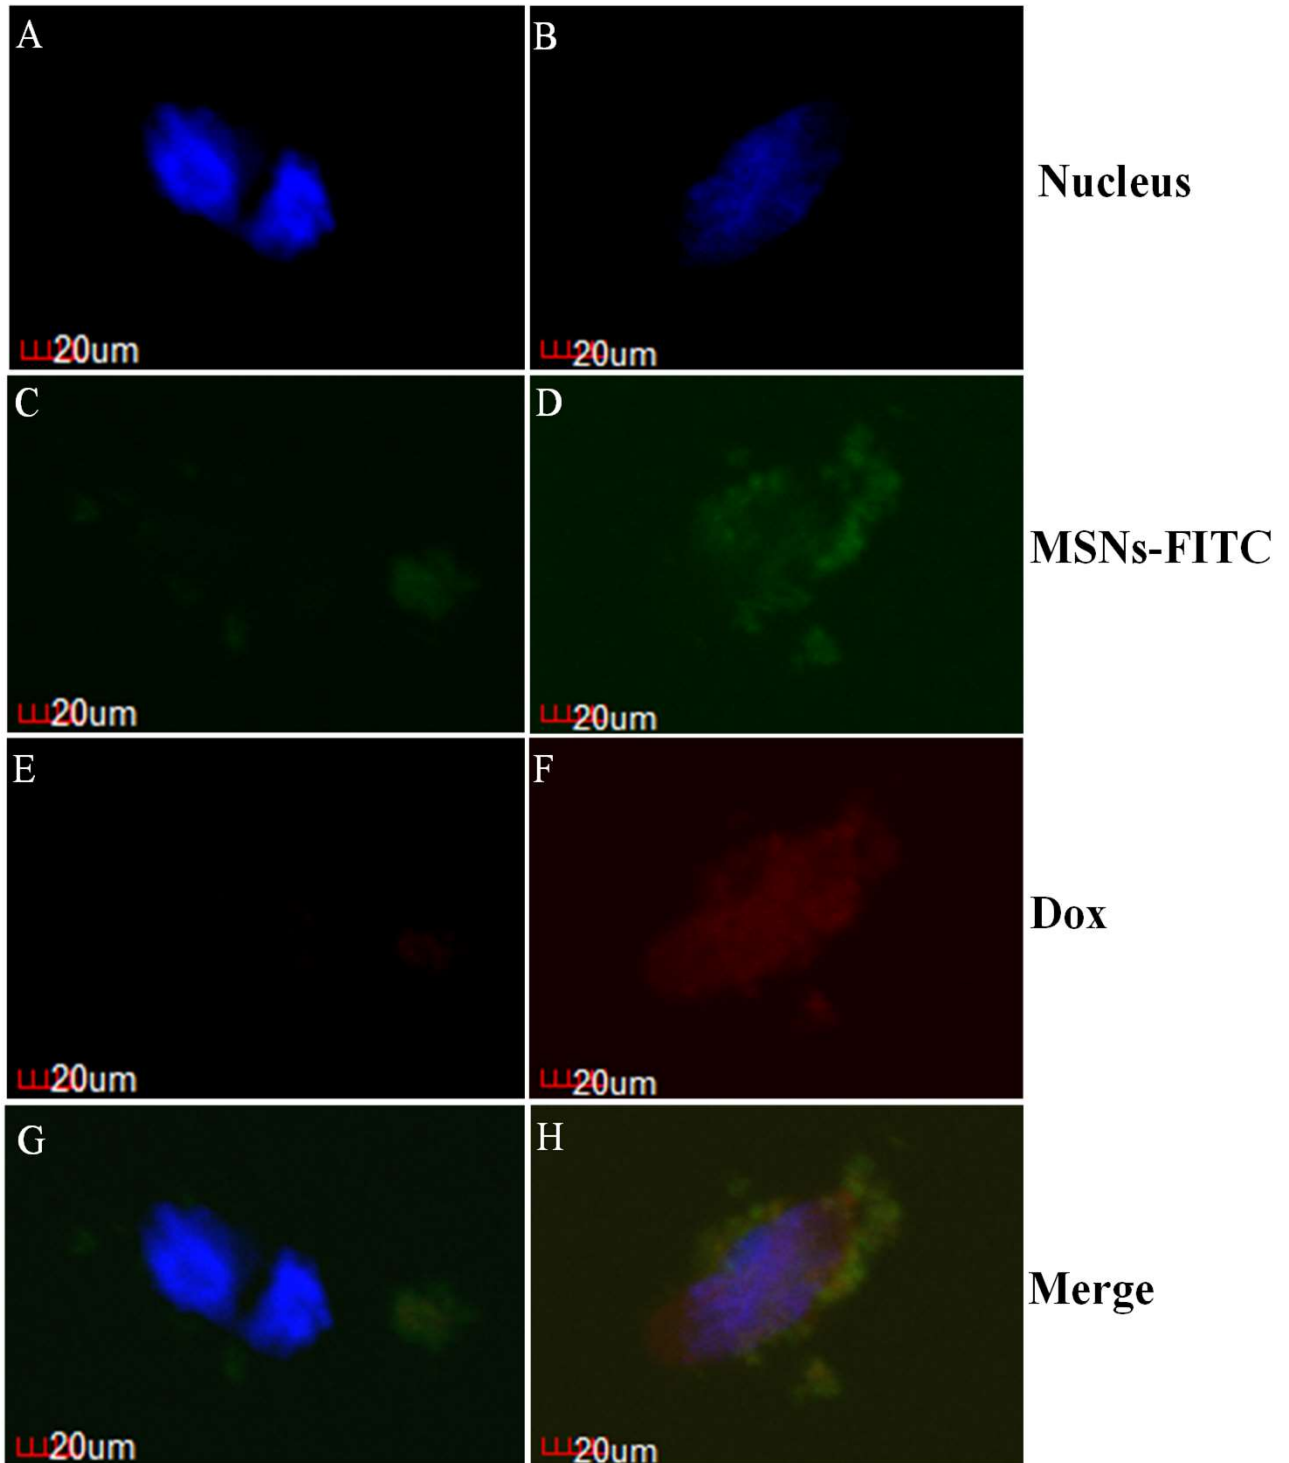

Figure 2

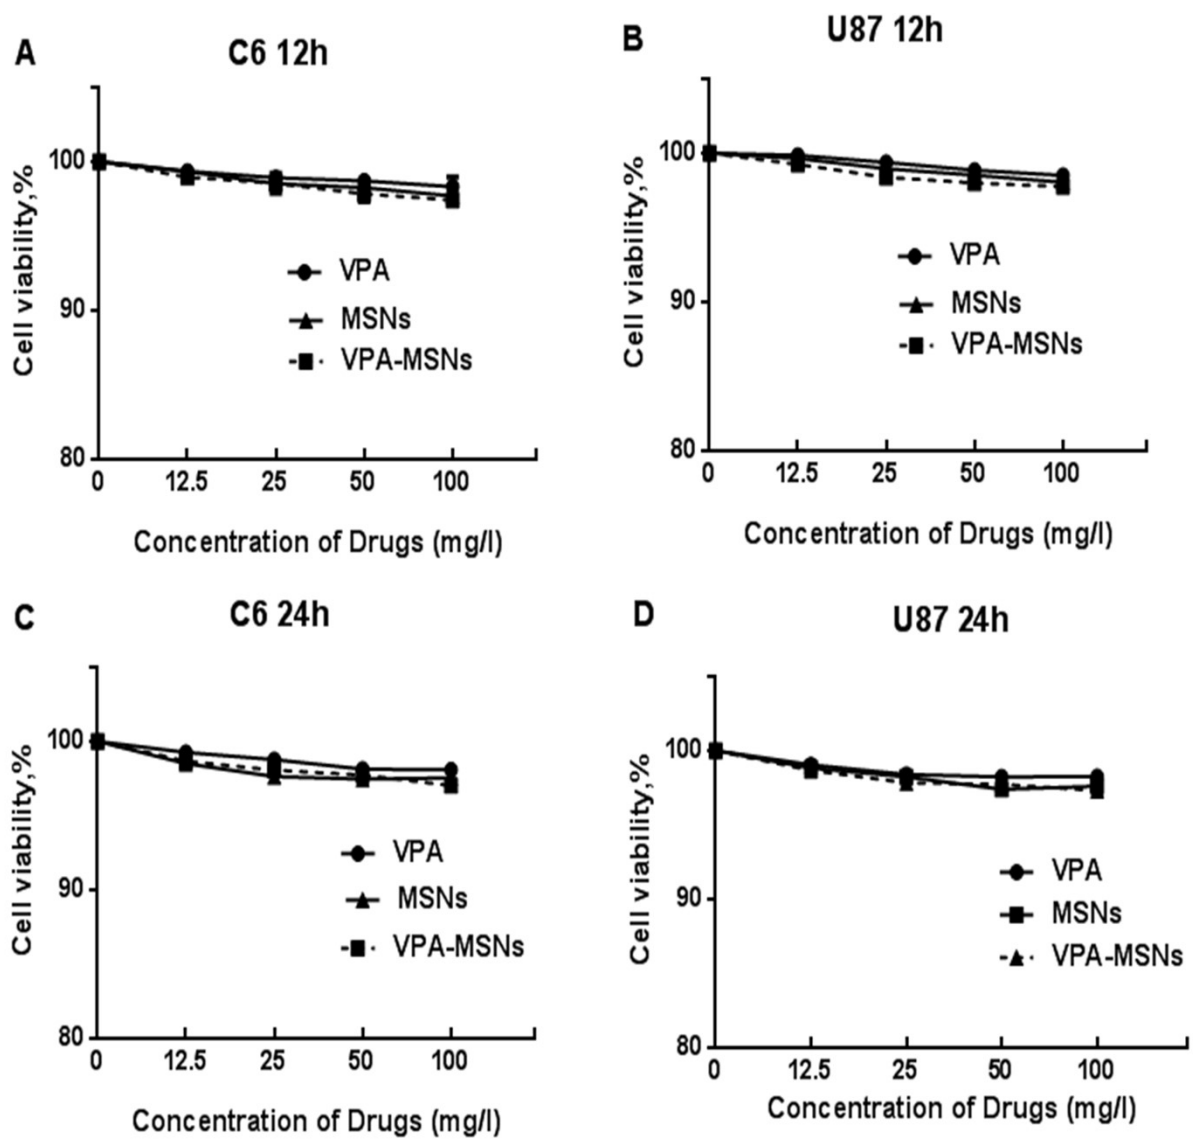

**Figure 3**

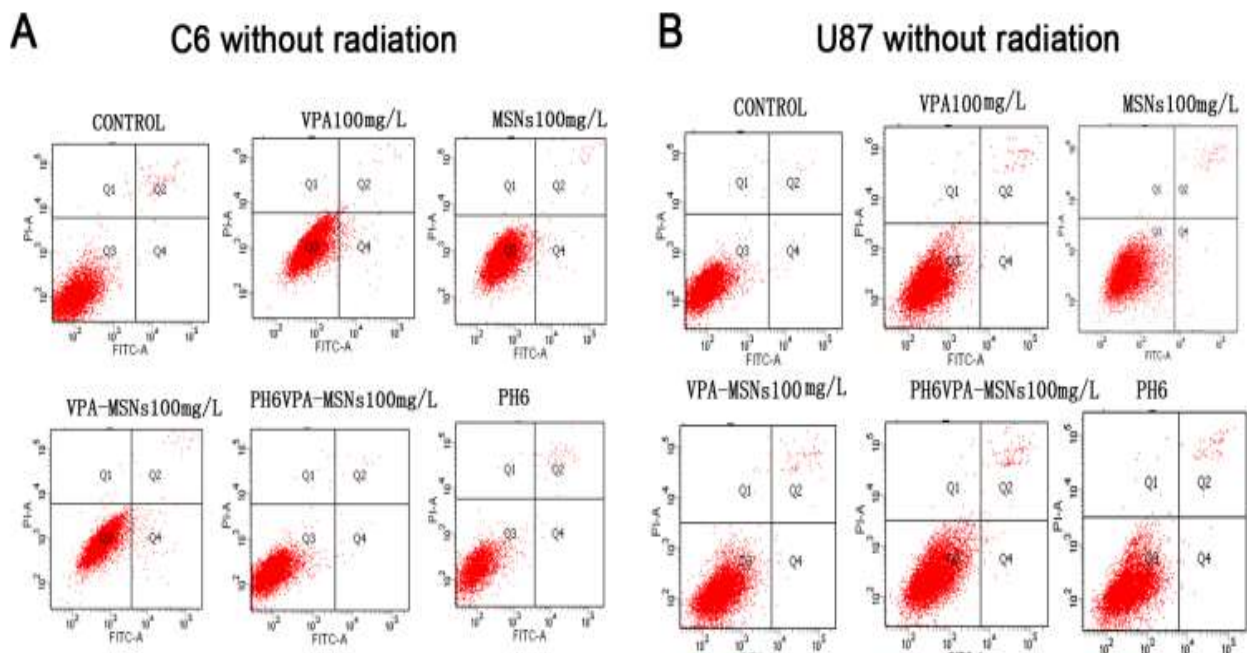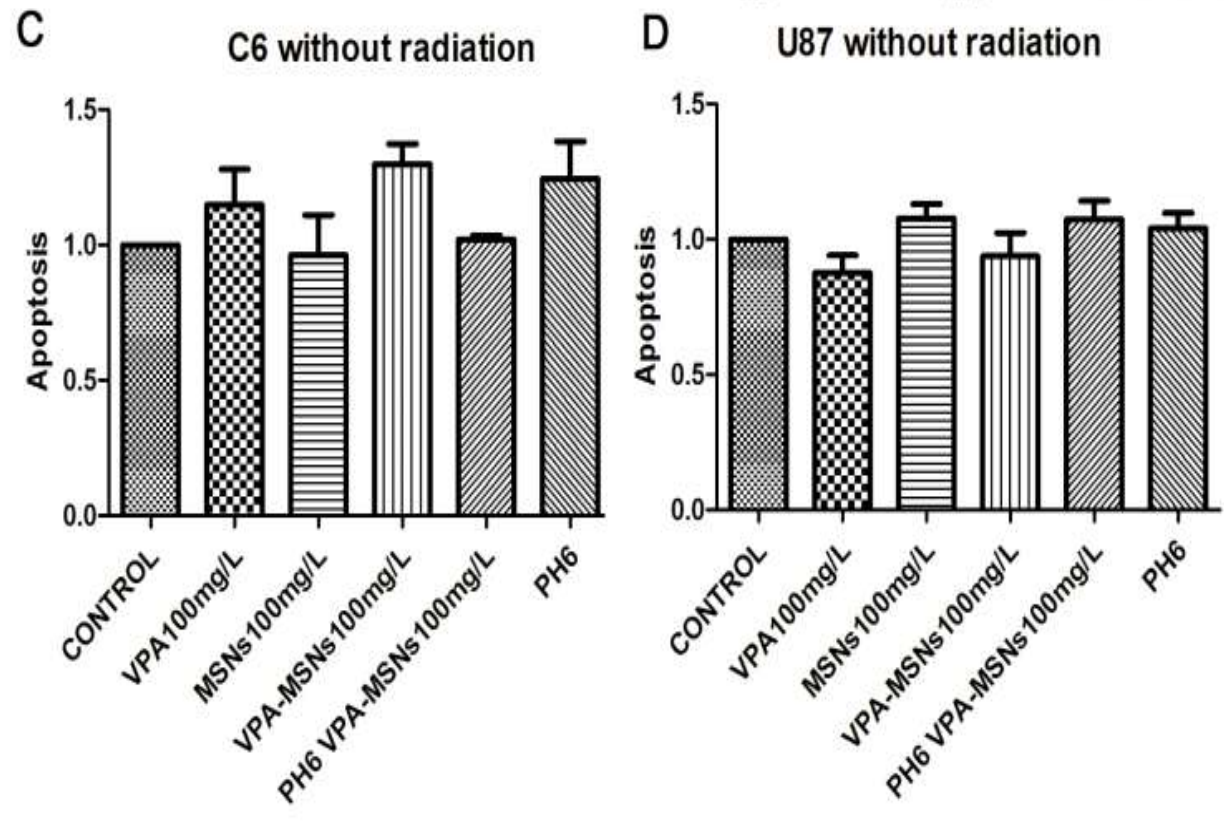

**Figure 4**

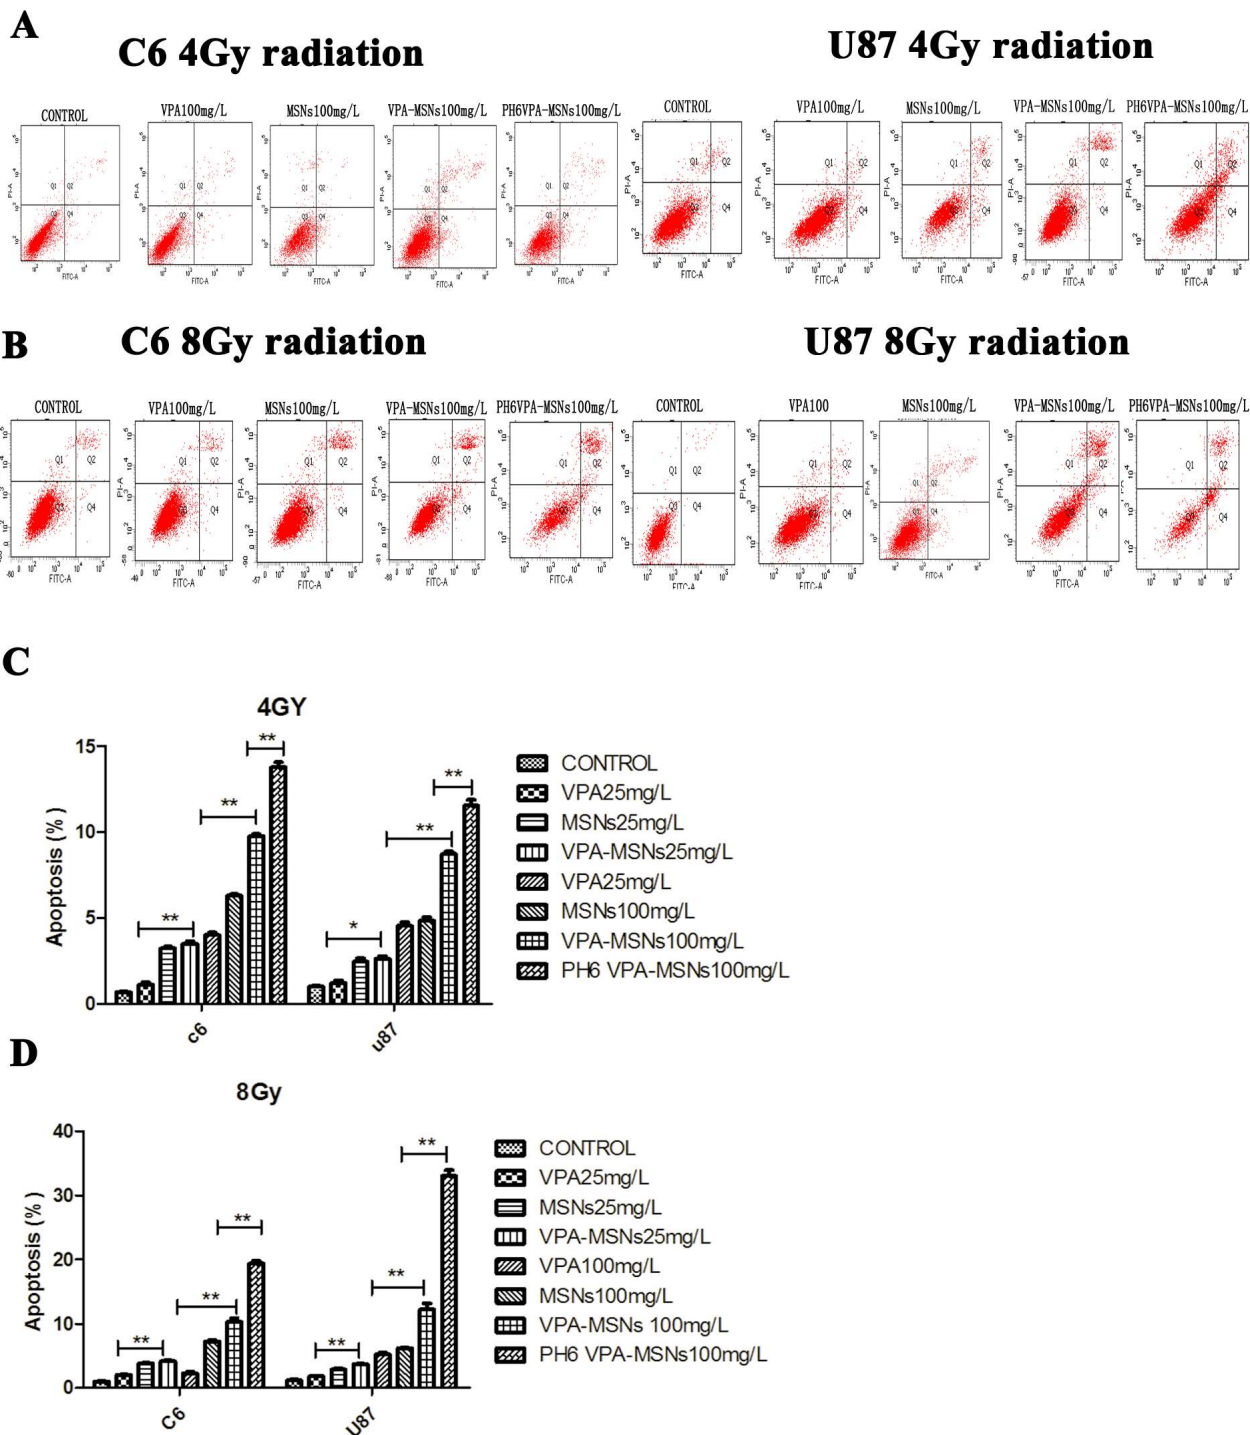

**Figure 5**

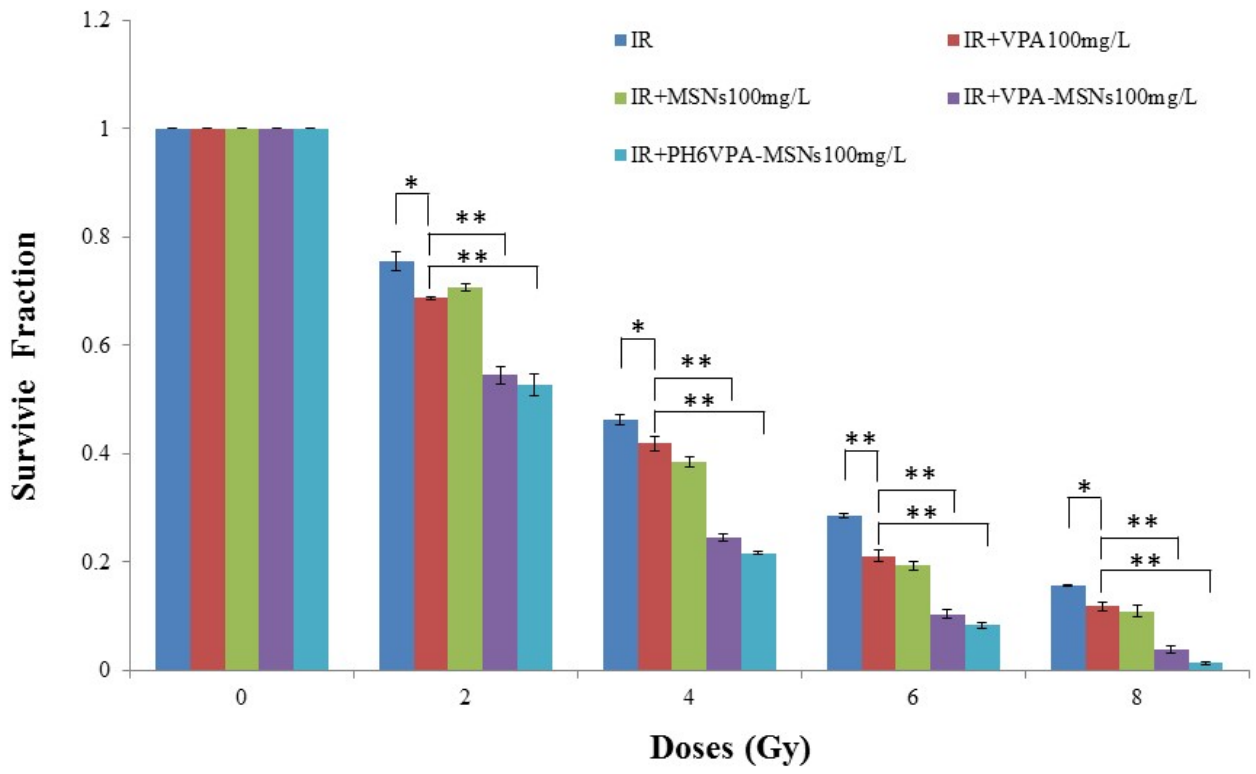

Figure 6

**A**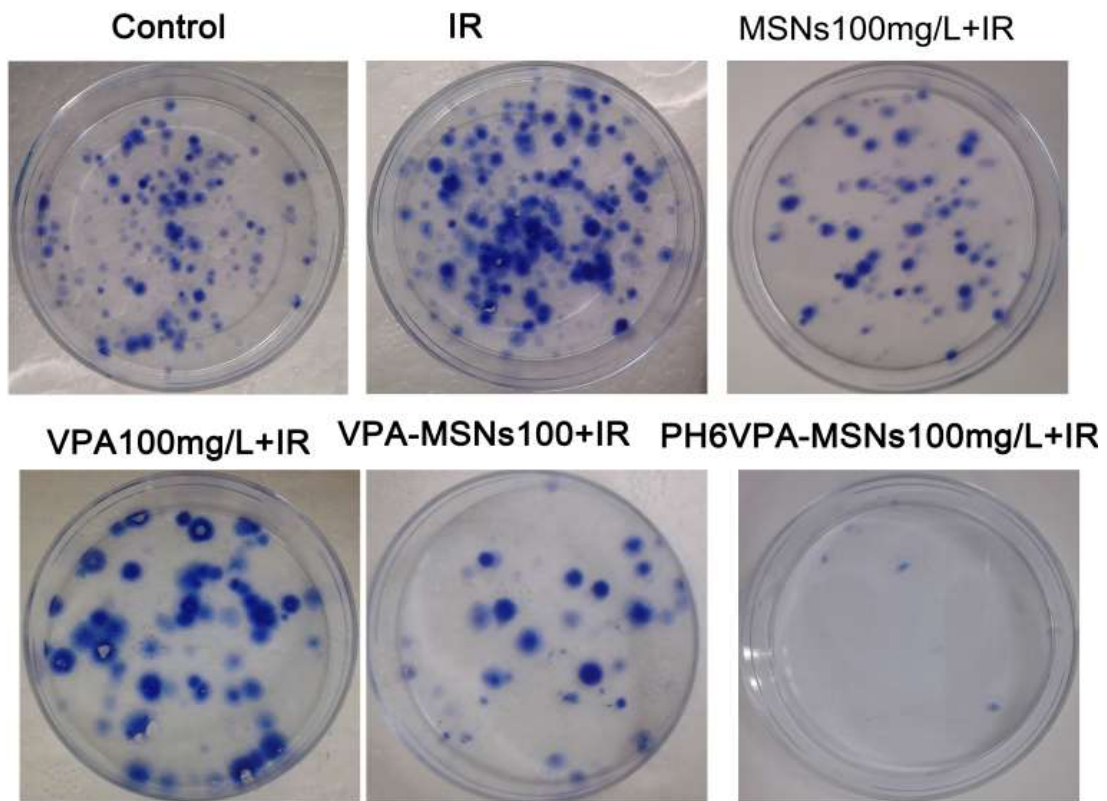**B**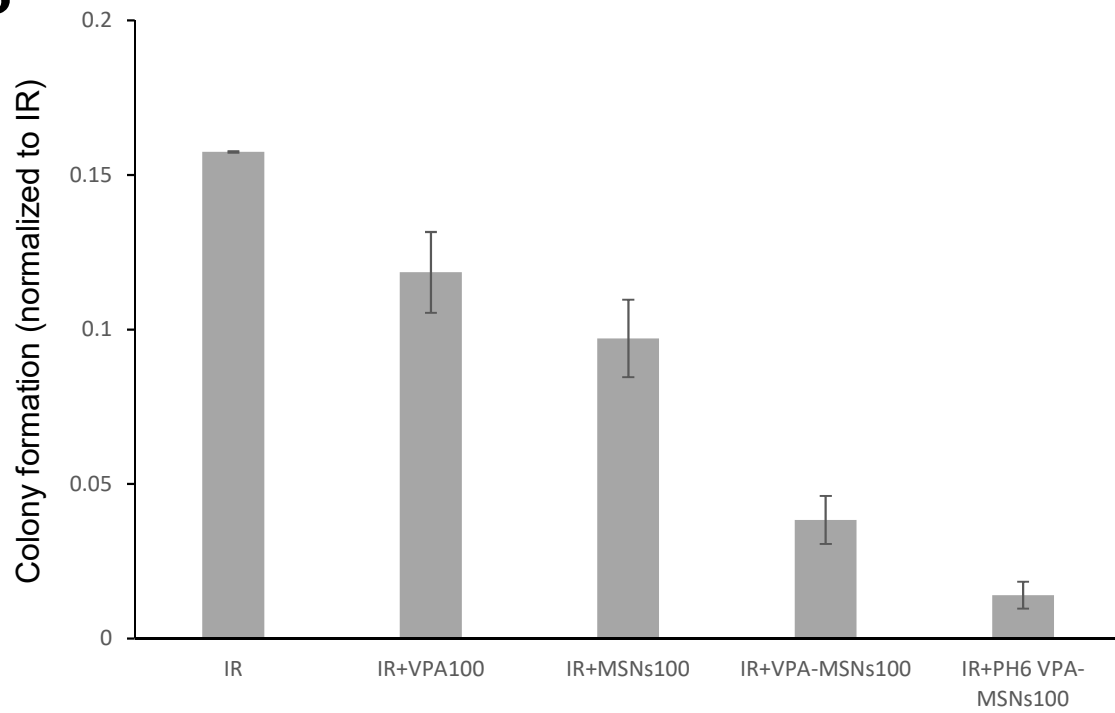**Figure 7**

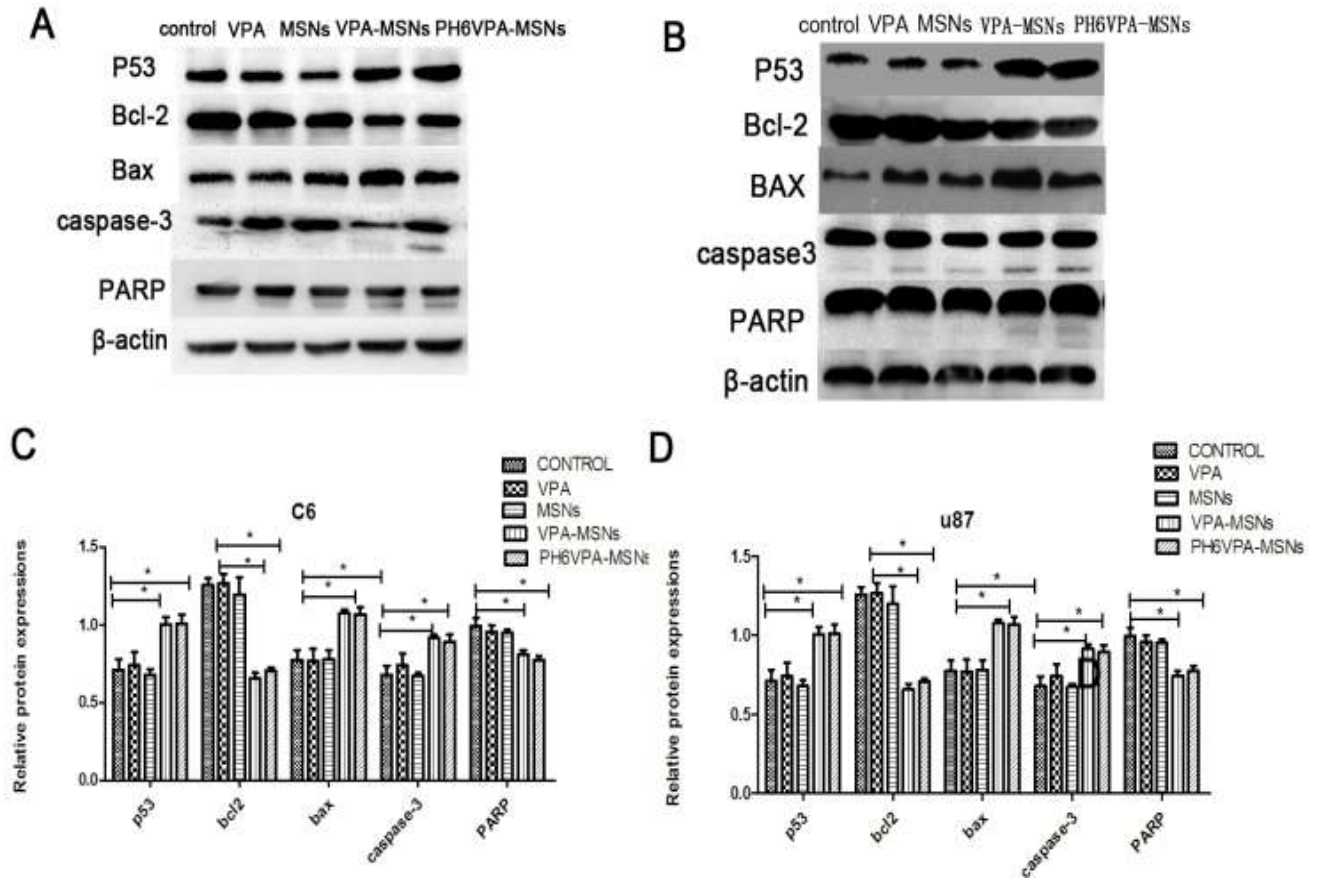

**Figure 8**



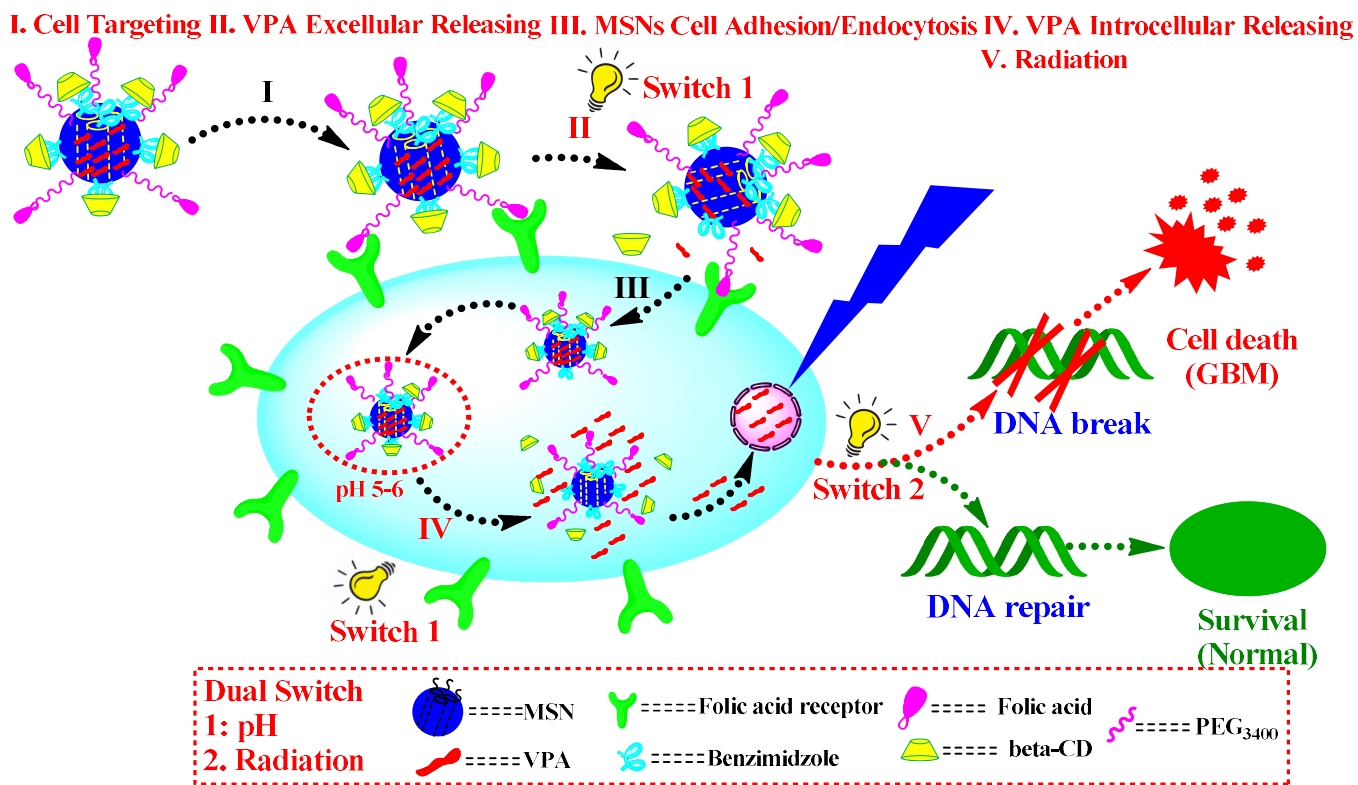

**Supplemental Figure 1**

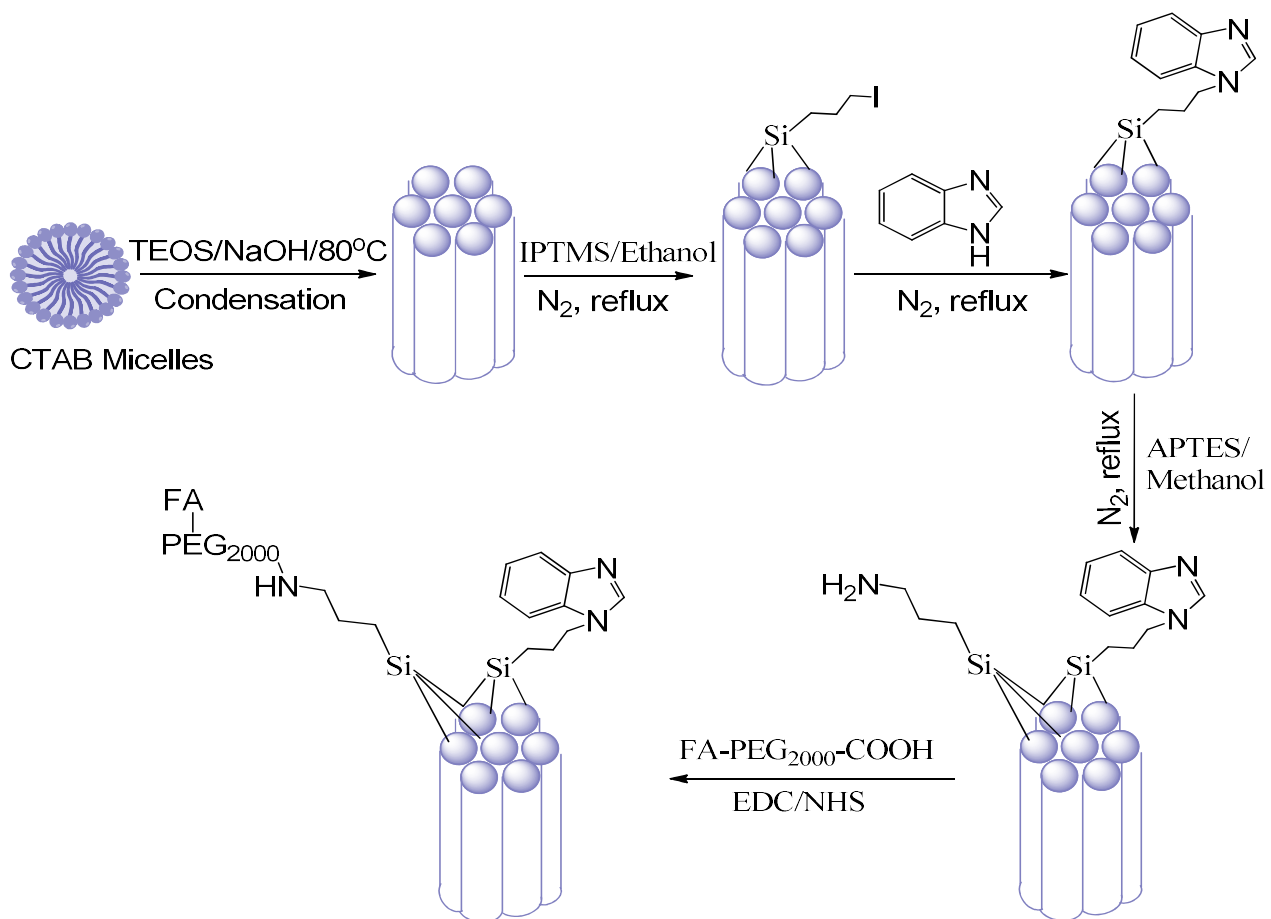

**Supplemental Figure 2**
